# Supplementary material for: Novel flaB gene variants of Leptospira interrogans detected in leptospirosis patient samples from the Western province of Sri Lanka
Source: Research Square preprint supplement (doi:10.21203/rs.3.rs-4764619/v2), 2025-01-06
Supplement: Supplementary file 1 [file 01b2c93ff56a4a26e621b21a.pdf]

(A) (i)

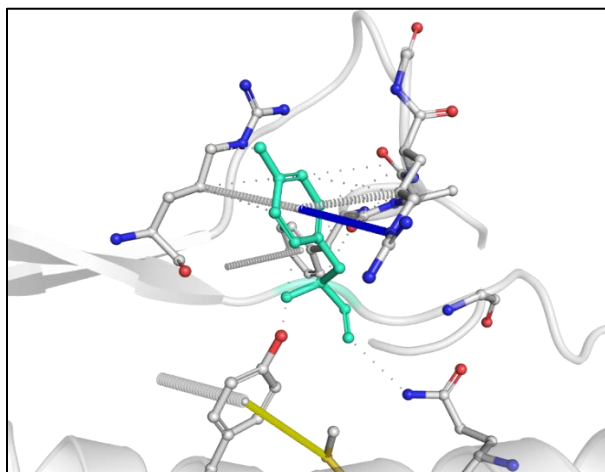

(ii)

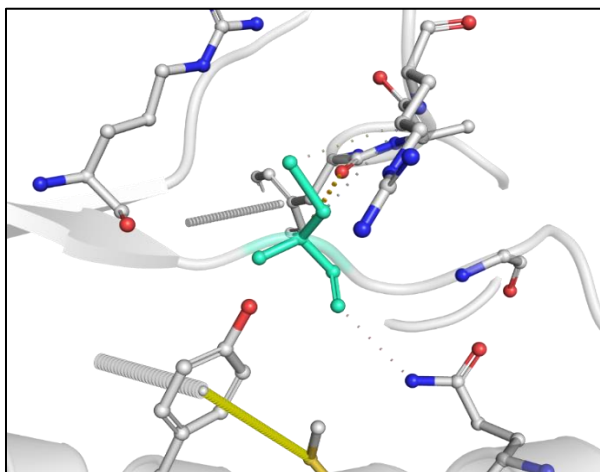

(B) (iii)

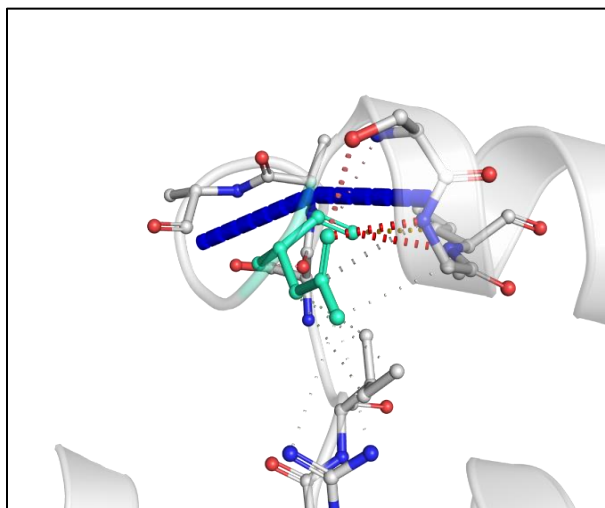

(iv)

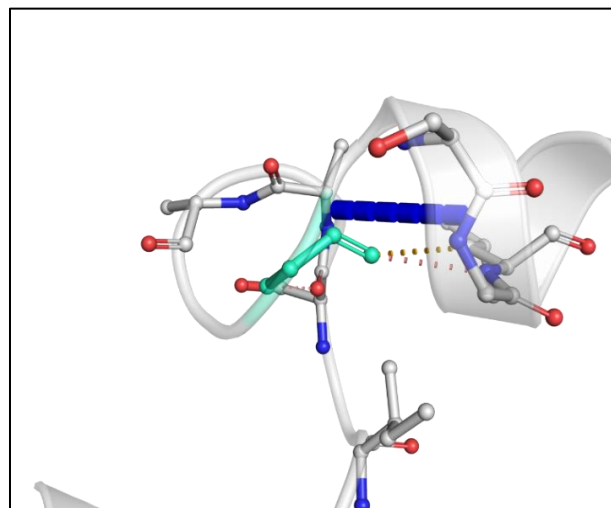

(v)

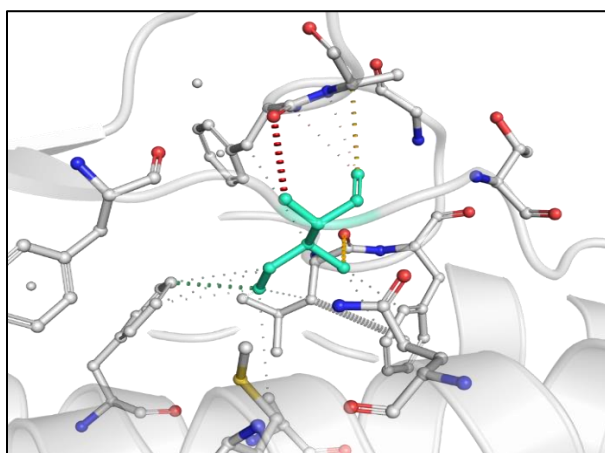

(vi)

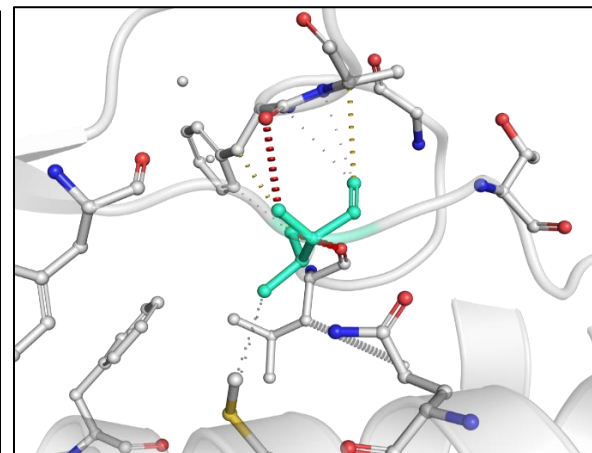

(C) (vii)

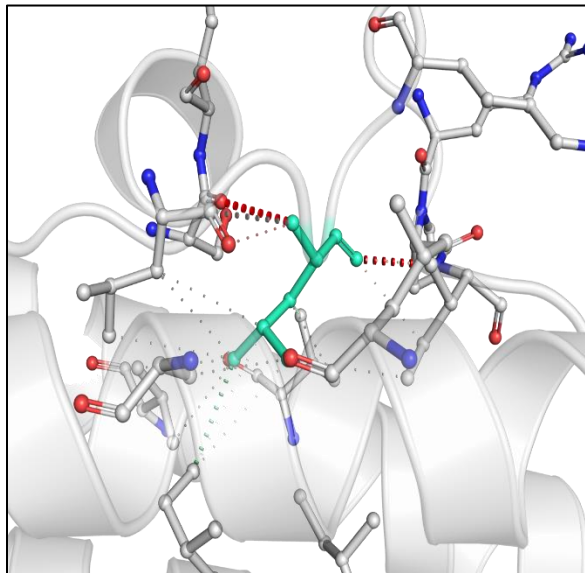

(viii)

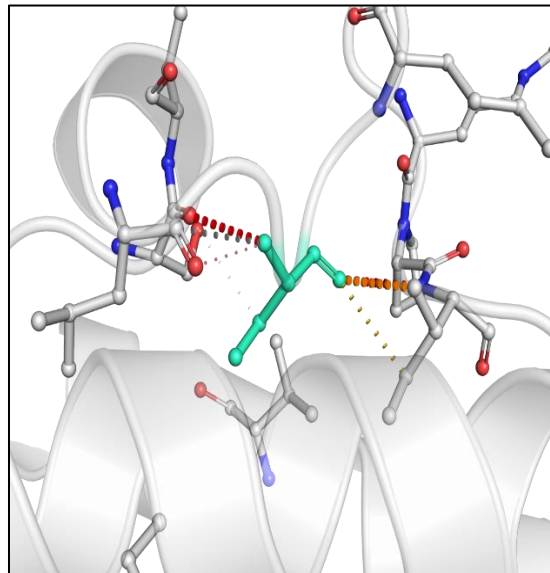

**Additional File 4: Figure S2: Predicted protein stability for the 3 variants compared to the template FlaB protein of *L. interrogans*** (computed using the tool available at DynaMut server (<https://biosig.lab.uq.edu.au/dynamut/>)). Predicted interatomic interactions at AA positions with substitutions in mutant FlaB protein compared to FlaB protein of *L. interrogans* (wild type) in patient samples, (A) Y164C wild type (i), 13SL215:WKR44734 (ii), (B) D42G wild type (iii), 13ML092:WKR38874 (iv), and I165T wild type (v), 13ML092:WKR38874 (vi), and (C) L175S wild type (vii), 13ML506:WKR38873 (viii).

| Bond Type                          | Color      |
|------------------------------------|------------|
| Hydrogen bonds                     | Red        |
| Water mediated hydrogen bonds      | Red        |
| Weak hydrogen bonds                | Orange     |
| Water mediated weak hydrogen bonds | Orange     |
| Halogen bonds                      | Blue       |
| Ionic interactions                 | Yellow     |
| Metal complex interactions         | Purple     |
| Aromatic contacts                  | Cyan       |
| Hydrophobic contacts               | Dark Green |
| Carbonyl contacts                  | Pink       |
