# Supplementary material for: Novel flaB gene variants of Leptospira interrogans detected in leptospirosis patient samples from the Western province of Sri Lanka
Source: Research Square preprint supplement (doi:10.21203/rs.3.rs-4764619/v2), 2025-01-06
Supplement: Supplementary file 1 [file fc7868acfa52bc96b4740493.docx]

**Table S2** Predicted changes in the FlaB protein of the 3 variants compared to the wild type FlaB protein of *L. interrogans*

* with reference to LC505621; # with reference to: CP039258
