# Supplementary material for: Novel flaB gene variants of Leptospira interrogans detected in leptospirosis patient samples from the Western province of Sri Lanka
Source: Research Square preprint supplement (doi:10.21203/rs.3.rs-4764619/v2), 2025-01-06
Supplement: Supplementary file 2 [file ff4fee12b652882d179856fb.docx]

**Table S1: Sequences of primers and product sizes for nested-PCR for *flaB* gene ampliﬁcation.**

| **Primer name** | **Sequence** | **PCR product size (bp)** | **Reference** |
| --- | --- | --- | --- |
| *fla*B (F) external | TCTCACCGTTCTCTAAAGTTCAAC | 852 | Kawabata et al., 2001; Koizumi et al., 2008 |
| *fla*B (R) external | CTGAATTCGGTTTCATATTTGCC |
| *fla*B (F) internal | TGTGCACAAGACGATGAAAGC | 732 | Koizumi et al., 2008 |
| *fla*B (R) internal | AACATTGCCGTACCACTCTG |
